# Supplementary material for: Safety and Activity of PolyPEPI1018 Combined with Maintenance Therapy in Metastatic Colorectal Cancer: an Open-Label, Multicenter, Phase Ib Study
Source: PubMed Central journal article supplement — Clin Cancer Res. 2022 Apr 26;28(13):2818–29. doi: 10.1158/1078-0432.CCR-22-0112 (PMC9365360; doi:10.1158/1078-0432.ccr-22-0112), 2022-04-26
Supplement: ccr-22-0112_figure_s1_supps1.pdf [file ccr-22-0112_figure_s1_supps1.pdf]

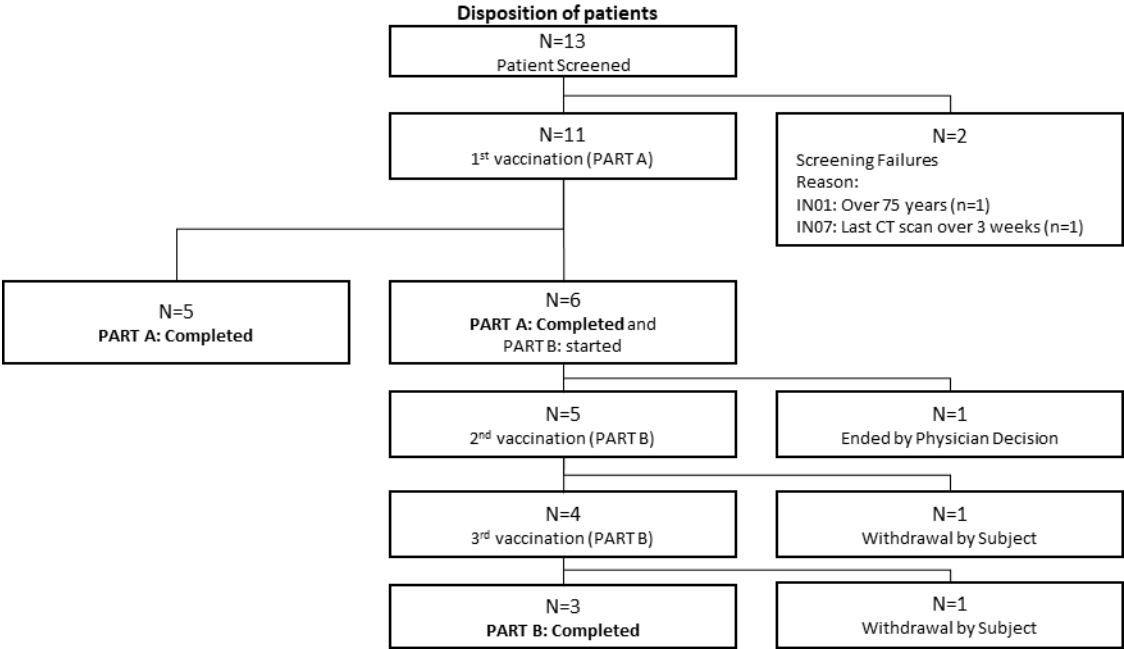

**Figure S1: Trial profile and disposition of patients.** CT, computerized tomography; IN, inclusion (criteria).
