# Supplementary material for: Safety and Activity of PolyPEPI1018 Combined with Maintenance Therapy in Metastatic Colorectal Cancer: an Open-Label, Multicenter, Phase Ib Study
Source: PubMed Central journal article supplement — Clin Cancer Res. 2022 Apr 26;28(13):2818–29. doi: 10.1158/1078-0432.CCR-22-0112 (PMC9365360; doi:10.1158/1078-0432.ccr-22-0112), 2022-04-26
Supplement: ccr-22-0112_figure_s2_supps2.pdf [file ccr-22-0112_figure_s2_supps2.pdf]

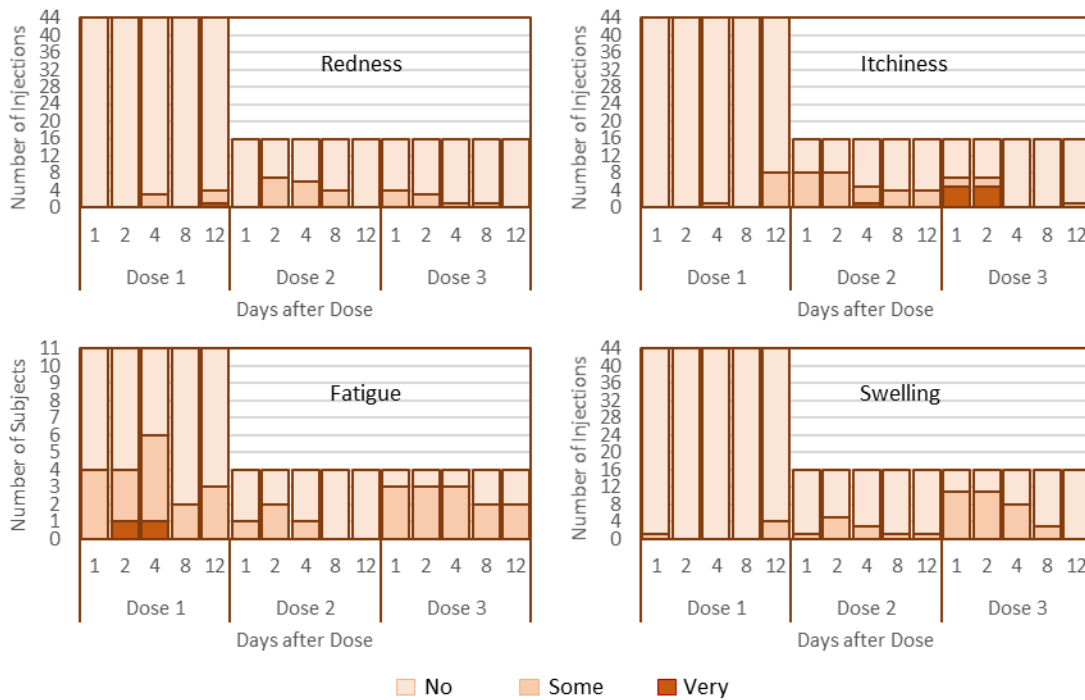

**Figure S2: Patient diary.** Patients observed their vaccination sites 5 times for up to 12 days after each dose and recorded their observations for each vaccination site separately (4 sites for each dose) in three categories: redness, itchiness, and swelling and at three grading scale: “not at all”, “some”, or “very”. Also, patients recorded if they felt fatigue. Number of injections = number of patients x 4 injections.
