# Supplementary material for: Safety and Activity of PolyPEPI1018 Combined with Maintenance Therapy in Metastatic Colorectal Cancer: an Open-Label, Multicenter, Phase Ib Study
Source: PubMed Central journal article supplement — Clin Cancer Res. 2022 Apr 26;28(13):2818–29. doi: 10.1158/1078-0432.CCR-22-0112 (PMC9365360; doi:10.1158/1078-0432.ccr-22-0112), 2022-04-26
Supplement: ccr-22-0112_figure_s3_supps3.pdf [file ccr-22-0112_figure_s3_supps3.pdf]

**A**

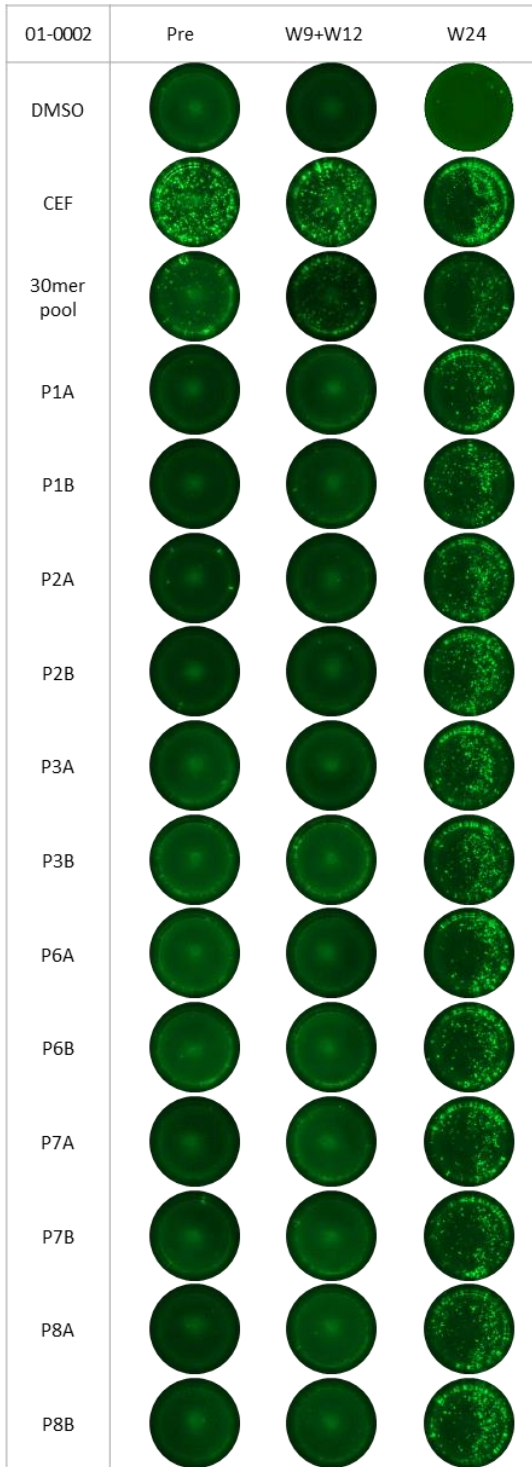

**B**

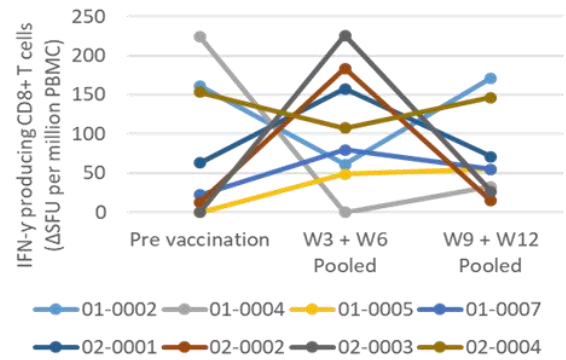

**C**

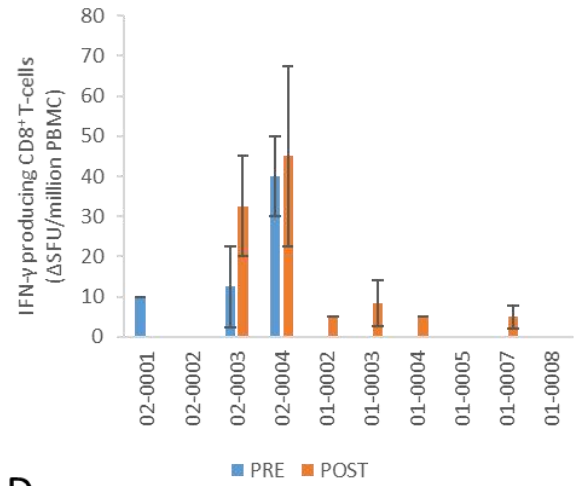

**D**

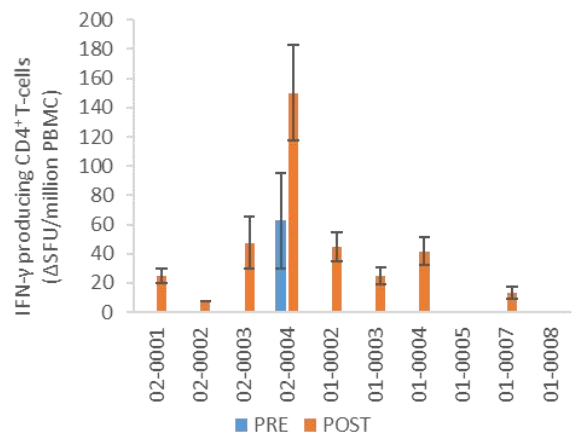

**E**

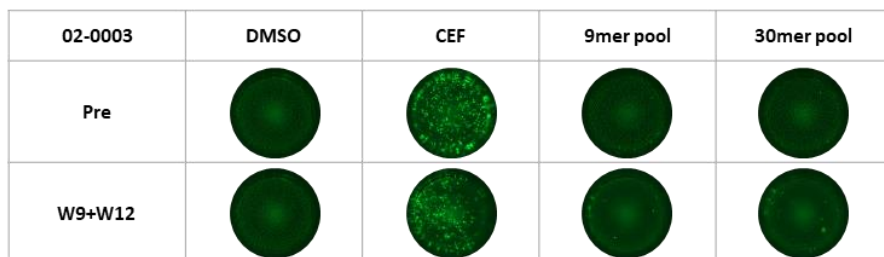

**Figure S3: The breadth and magnitude of PolyPEPI1018-specific T cell responses**

(A) Representative well images (one of 2 or three replicates) of IVS ELISpot (FluoroSpot) for patient 01-0002. Individual 9-mers (Supplementary Table S1), pooled 30-mers, DMSO negative control, and CEF positive control conditions are presented for 3 timepoints (PRE, Week 9+12 pooled and Week 24). (B) Time course of the CD8<sup>+</sup> T cell responses through baseline (pre-vaccination) and Week 12 measured after a single dose. Each line represents one patient (n=8). Determined using IVS ELISpot. (C-D) Ex vivo detected PolyPEPI1018 vaccine-specific CD8<sup>+</sup> (detected for pooled 9mers) and CD4<sup>+</sup> (detected for pooled 30mers) T cell responses at baseline (PRE) and after vaccination (POST) using *ex vivo* ELISpot assay.  $\Delta$ SFU – background corrected spot-forming units. Error bars represent SEM. (E) Representative well images (one of two replicates) of *ex vivo* ELISpot (FluoroSpot) for subject 02-0003 for 2 timepoints (PRE and Week 9+12 pooled) with the following conditions: pooled 9mer, or pooled 30mer test peptides, DMSO negative control, CEF positive control.
