# Supplementary material for: Safety and Activity of PolyPEPI1018 Combined with Maintenance Therapy in Metastatic Colorectal Cancer: an Open-Label, Multicenter, Phase Ib Study
Source: PubMed Central journal article supplement — Clin Cancer Res. 2022 Apr 26;28(13):2818–29. doi: 10.1158/1078-0432.CCR-22-0112 (PMC9365360; doi:10.1158/1078-0432.ccr-22-0112), 2022-04-26
Supplement: ccr-22-0112_figure_s4_supps4.pdf [file ccr-22-0112_figure_s4_supps4.pdf]

**A**

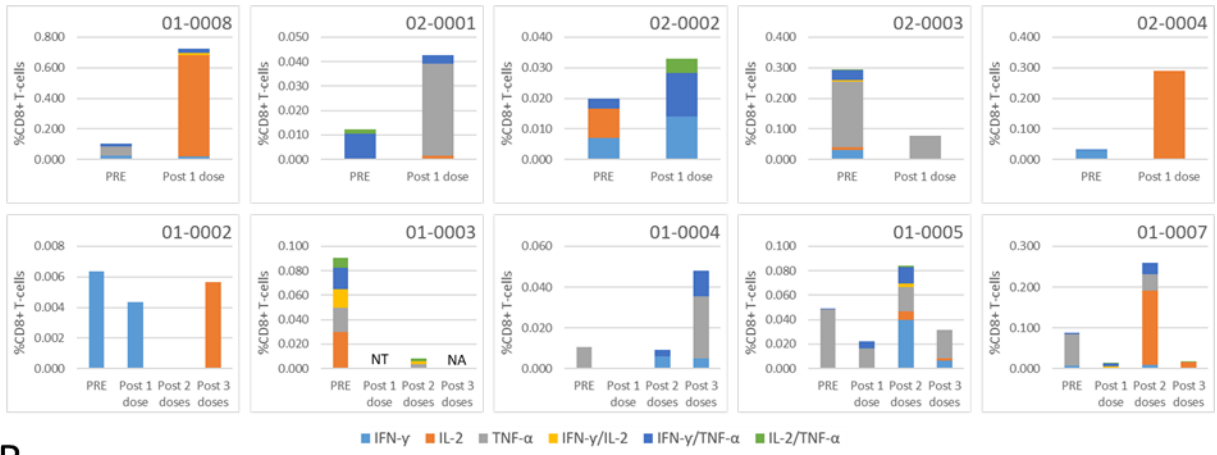

**B**

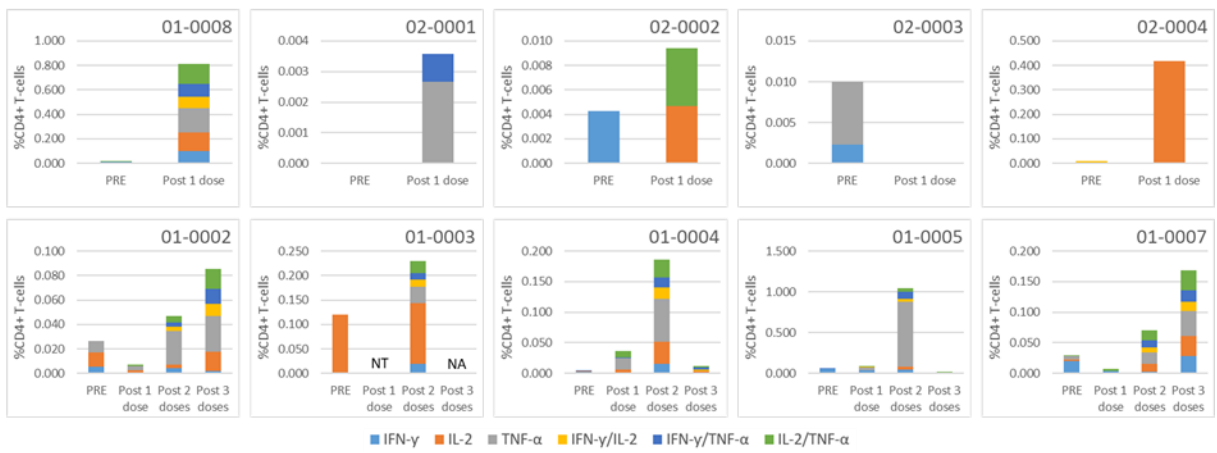

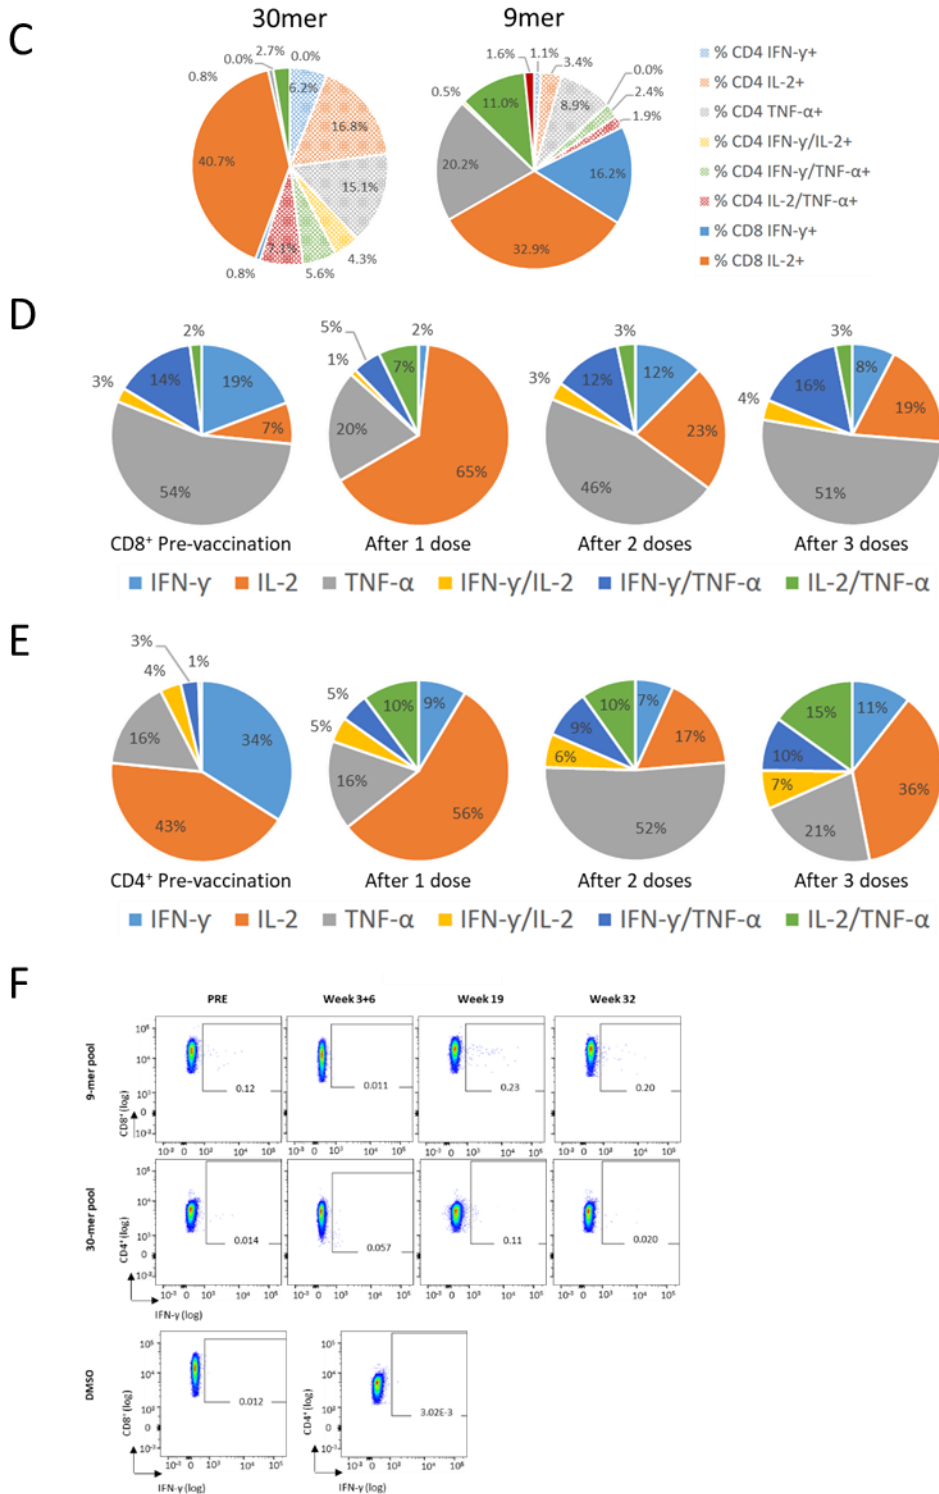

(A) or pooled 30mers (B) were used. DMSO negative control was subtracted from all values. NT, not tested, NA, not applicable. (C) Distribution of vaccine-specific CD8<sup>+</sup> and CD4<sup>+</sup> T-cells upon stimulation with 9-mer peptides and 30-mer peptides measured by *ex vivo* intracellular cytokine staining (ICS) assay. Average distribution of vaccine peptide-specific polyfunctional CD8<sup>+</sup> (D) and CD4<sup>+</sup> (E) T-cell Responses detected before vaccination (PRE), after 1 (*n*=9), 2 (*n*=4), or 3 (*n*=4) vaccine doses as measured by *ex vivo* ICS assay. (F) Representative (*ex vivo*) IFN- $\gamma$  – CD8 or CD4 ICS dot plots (one of three replicates) for patient 01-0005 before vaccination (PRE), and after 1 dose (week 3+6 pooled), after 2 doses (week 19), and after 3 doses (week 32) measured with pools of 9mers or 30mers and DMSO negative control.
