# Supplementary material for: Safety and Activity of PolyPEPI1018 Combined with Maintenance Therapy in Metastatic Colorectal Cancer: an Open-Label, Multicenter, Phase Ib Study
Source: PubMed Central journal article supplement — Clin Cancer Res. 2022 Apr 26;28(13):2818–29. doi: 10.1158/1078-0432.CCR-22-0112 (PMC9365360; doi:10.1158/1078-0432.ccr-22-0112), 2022-04-26
Supplement: ccr-22-0112_figure_s5_supps5.pdf [file ccr-22-0112_figure_s5_supps5.pdf]

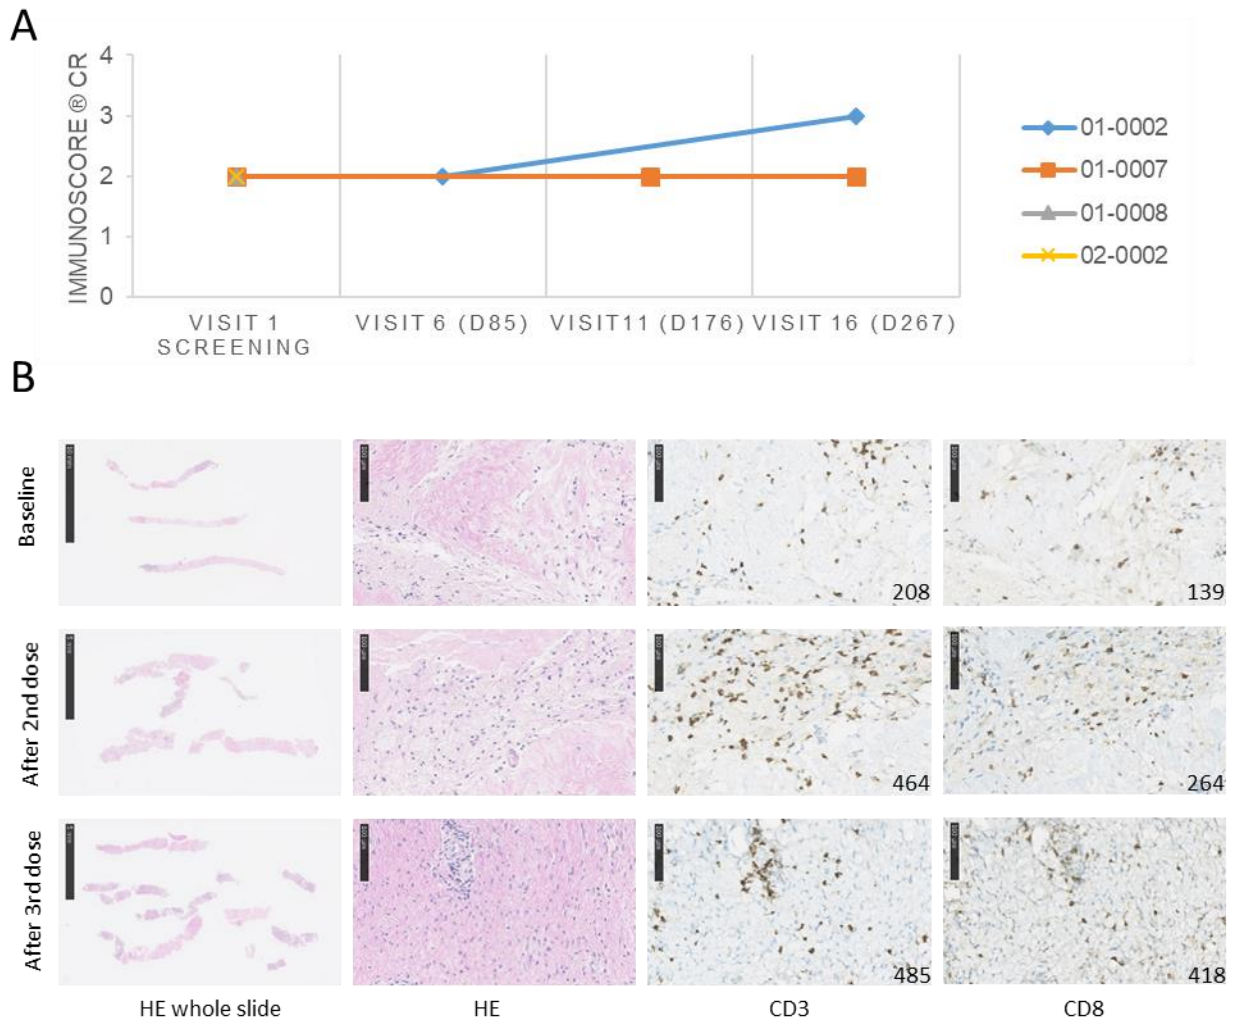

**Figure S5: Tumor-infiltrating lymphocyte (TIL) analysis:** (A) Immunoscoring obtained for tumor tissues pre- and post-vaccination. (B) Immunohistochemical staining of tumor tissues obtained from Patient 01-0007 using HaliDx's Immunoscoring CR TL assay. The number of stained cells per mm<sup>2</sup> tumor tissue section are indicated. HE – hematoxylin and eosin stain.
