# Supplementary material for: Safety and Activity of PolyPEPI1018 Combined with Maintenance Therapy in Metastatic Colorectal Cancer: an Open-Label, Multicenter, Phase Ib Study
Source: PubMed Central journal article supplement — Clin Cancer Res. 2022 Apr 26;28(13):2818–29. doi: 10.1158/1078-0432.CCR-22-0112 (PMC9365360; doi:10.1158/1078-0432.ccr-22-0112), 2022-04-26
Supplement: ccr-22-0112_figure_s6_supps6.pdf [file ccr-22-0112_figure_s6_supps6.pdf]

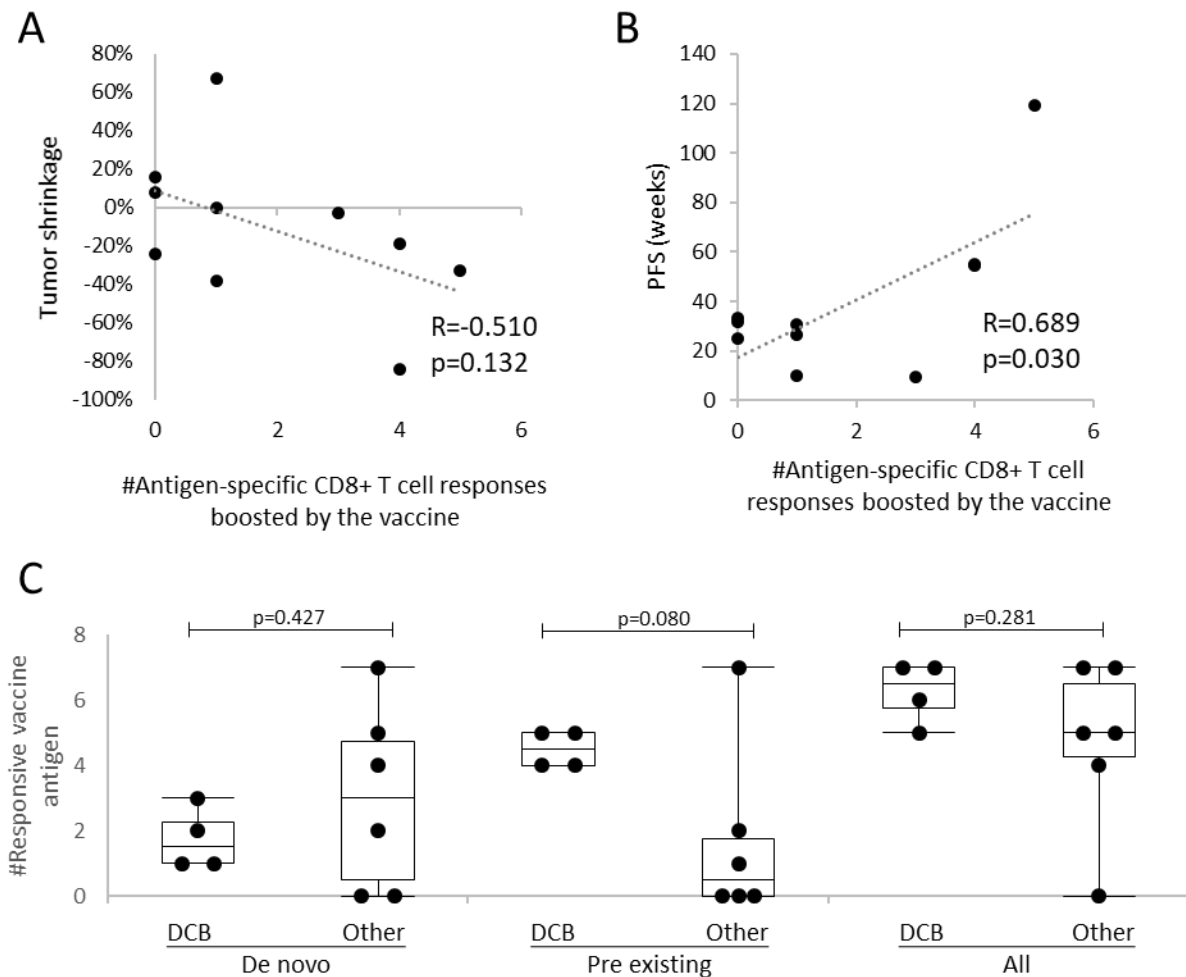

**Figure S6: Correlation analysis between immune responses measured by IVS ELISpot assay and clinical outcome.** Correlation between the breadth of vaccine-specific T cell responses and tumor shrinkage (A) or PFS (B). C: Correlation analysis between origin of CD8<sup>+</sup>T cell responses (induced by the tumor and / or the vaccine) and clinical benefit. DCB: Patients with objective tumor response (PR) and/or stabilized disease (SD) for at least 38 weeks; Others: patients with no DCB. *De novo*: newly induced T cell responses (not detected before vaccination). Pre-existing: T cell responses detected at baseline with/without boosting by the vaccine; All: De novo and pre-existing T cell responses; R: Pearson correlation coefficient. Box plots show individual patient data and median, each dot represents one patient. PFS: progression-free survival. #: number
