# Supplementary material for: Safety and Activity of PolyPEPI1018 Combined with Maintenance Therapy in Metastatic Colorectal Cancer: an Open-Label, Multicenter, Phase Ib Study
Source: PubMed Central journal article supplement — Clin Cancer Res. 2022 Apr 26;28(13):2818–29. doi: 10.1158/1078-0432.CCR-22-0112 (PMC9365360; doi:10.1158/1078-0432.ccr-22-0112), 2022-04-26
Supplement: ccr-22-0112_figure_s7_supps7.pdf [file ccr-22-0112_figure_s7_supps7.pdf]

Hubbard et al, Safety and activity of PolyPEP11018 combined with maintenance therapy in metastatic colorectal cancer: an open-label, multicenter, phase 1b study

A

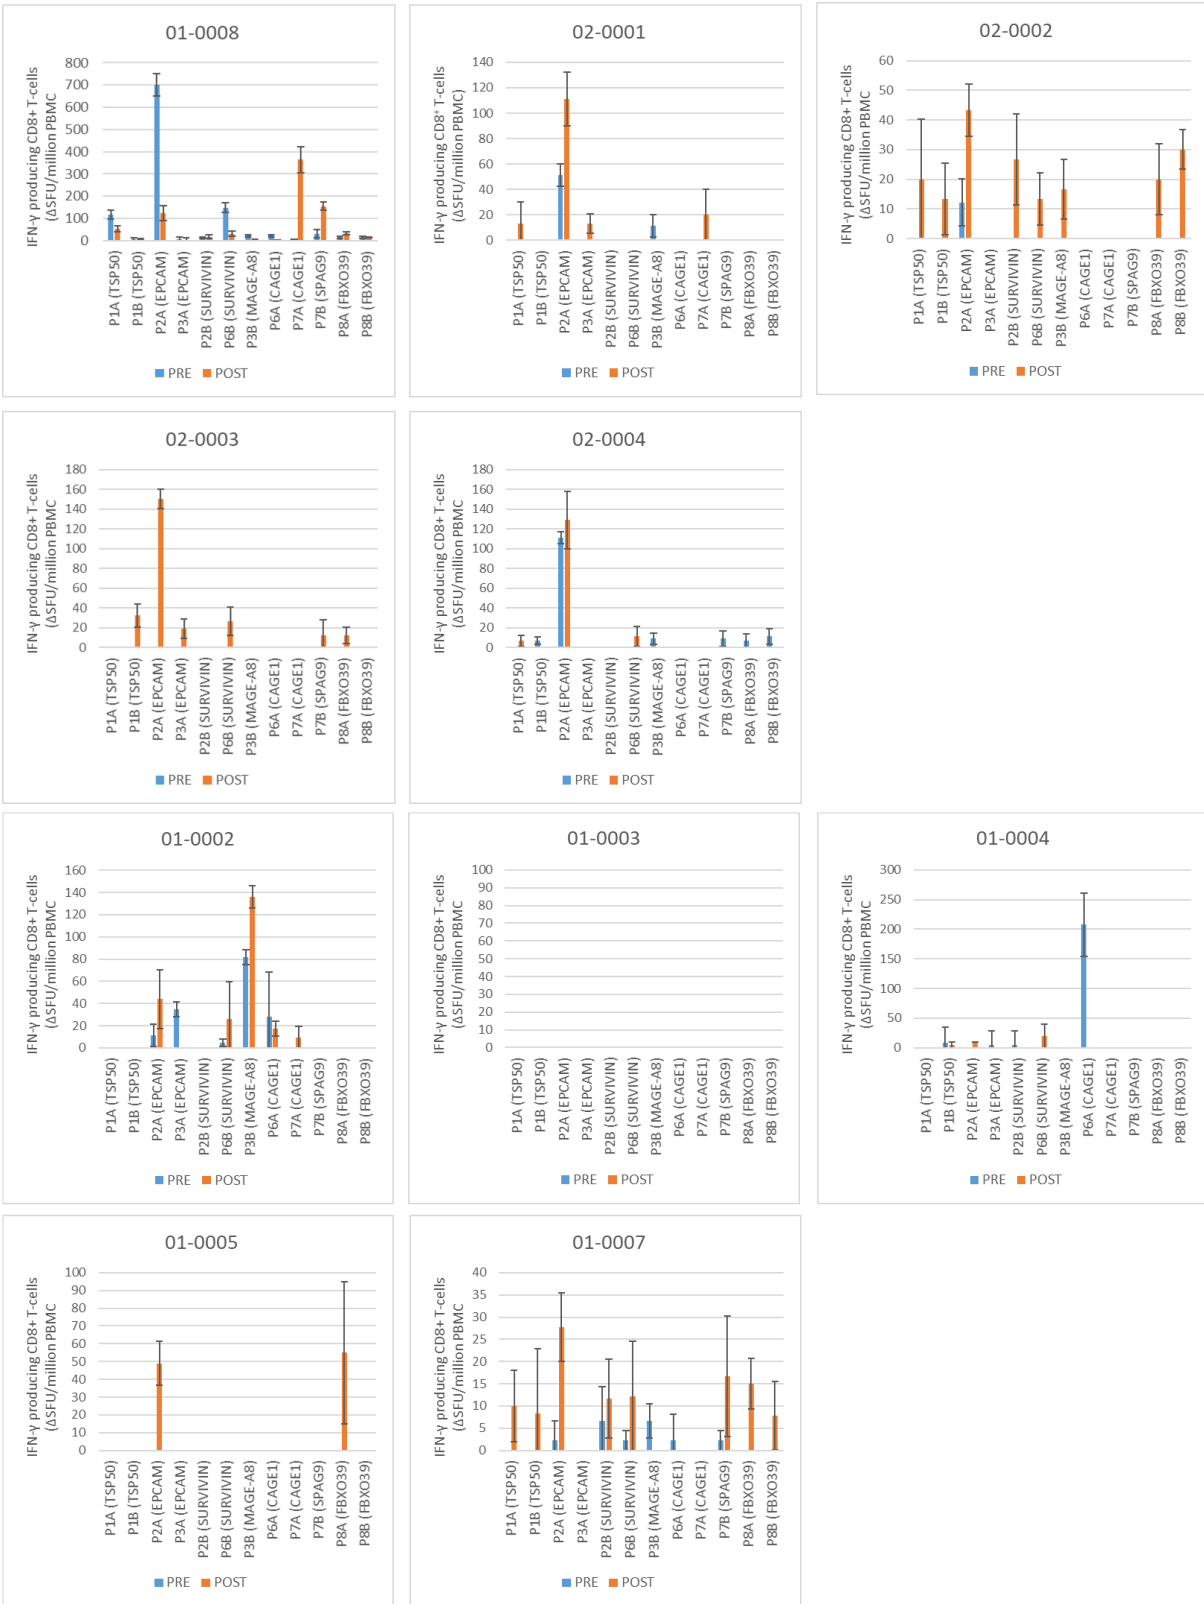

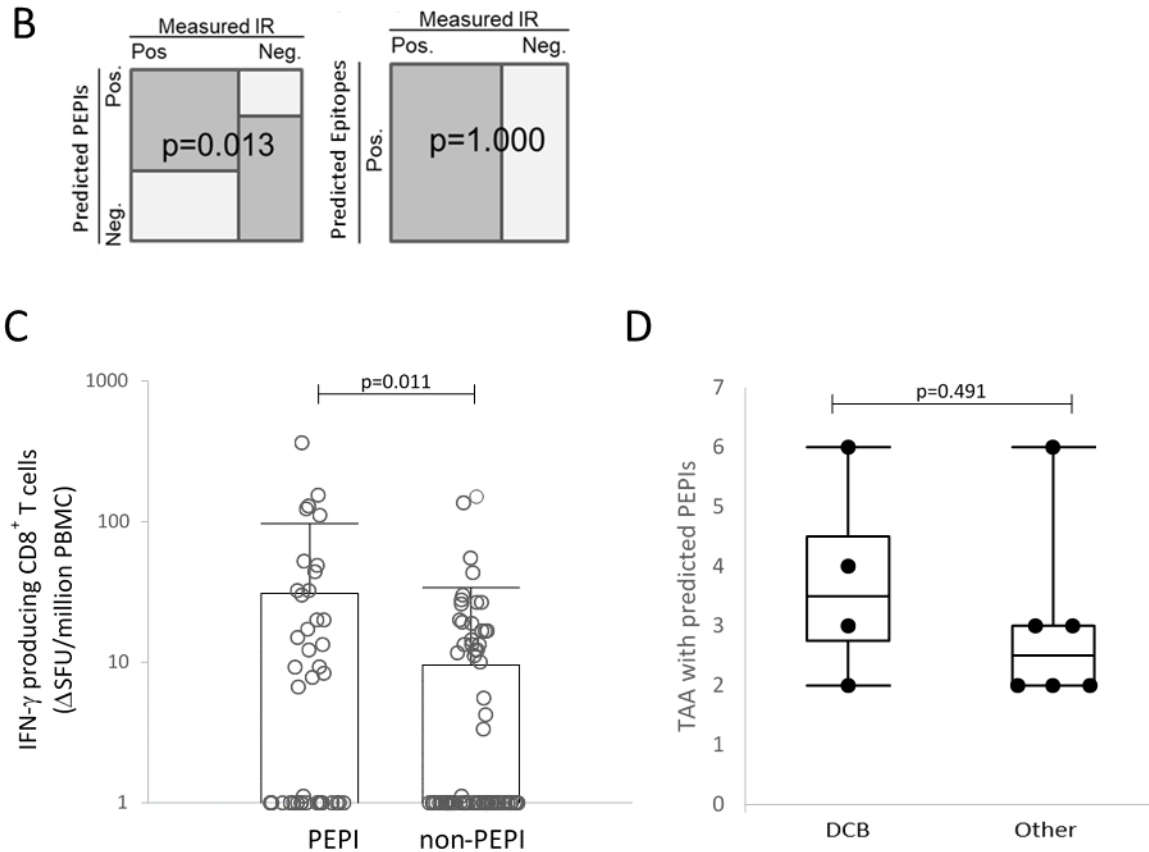

**Figure S7: Host HLA genotype through PEPIs predict TAA-specific immune responses and indicate treatment benefit.** (A) The number and magnitude of vaccine-specific IFN- $\gamma$  producing CD8<sup>+</sup> T cell responses depicted by patients detected for each of the twelve 9-mer test peptide (core epitopes in Supplementary Table S1). Data presented were measured by IVS ELISpot assay within 12 week after the first dose, n=10. (B) Variable dependency analysis using 2 x 2 contingency table (positive and negative data analysis) and Fisher Exact test between IVS ELISpot measured CD8<sup>+</sup> T cell responses (IR) and predicted PEPIs (epitopes binding  $\geq 3$  autologous HLA class I alleles) (left panel) and Epitopes (binding  $\geq 1$  autologous HLA class I alleles) (right panel) (related to Supplementary Table S3) (C) Magnitude of CD8<sup>+</sup> T cell responses detected by IVS ELISpot assay for the 12 peptides (9-mers) predicted as PEPIs (epitopes binding  $\geq 3$  autologous HLA class I alleles) and for non-PEPIs (epitopes binding  $< 3$  autologous HLA class I alleles, or non-binding) for each patient (12 peptides x 10 patients = 120 datapoints, Supplementary Table S3). Average and individual data for each subject are presented, n=10 (D) Impact of TAA-specific CD8<sup>+</sup> T cell responses as predicted by PEPIs on treatment benefit. Predicted multi-antigenic responses were calculated by counting the vaccine TAAs which contain at least one PEPI based on HLA-genotype of each patient. DCB: Patients with objective tumor response (PR) and/or stabilized disease (SD) for at least 50 weeks on maintenance treatment; Others: patients with no DCB.  $\Delta$ SFU, background corrected spot-forming units.
