# Supplementary material for: Safety and Activity of PolyPEPI1018 Combined with Maintenance Therapy in Metastatic Colorectal Cancer: an Open-Label, Multicenter, Phase Ib Study
Source: PubMed Central journal article supplement — Clin Cancer Res. 2022 Apr 26;28(13):2818–29. doi: 10.1158/1078-0432.CCR-22-0112 (PMC9365360; doi:10.1158/1078-0432.ccr-22-0112), 2022-04-26
Supplement: ccr-22-0112_table_s1_suppts1.pdf [file ccr-22-0112_table_s1_suppts1.pdf]

**Table S1: Composition of PolyPEPI1018 vaccine and predicted responses rates in *in silico* model population.** PolyPEPI1018 comprises six 30-mer peptides by joining two 15-mers derived from seven tumor-associated antigens (TAAs) frequently expressed in mCRC.

| Vaccine peptide <sup>a</sup> | Source protein (TAA) <sup>b</sup> | Core HLA class I epitopes (9mers) <sup>c</sup> | 15mer fragments and core HLA class I epitopes (9mers) <sup>#</sup> | Predicted <i>in silico</i> response rate <sup>d</sup> |                   |       |
|------------------------------|-----------------------------------|------------------------------------------------|--------------------------------------------------------------------|-------------------------------------------------------|-------------------|-------|
|                              |                                   |                                                |                                                                    | HLA class I PEPI                                      | HLA class II PEPI |       |
| CRC_P1                       | TSP50                             | <b><u>P1A</u></b>                              | PST <b><u>TTMETQFPV</u></b> SEGG                                   | 53%                                                   | 88%               |       |
|                              | TSP50                             | <b><u>P1B</u></b>                              | SR <b><u>YRAQRFWSW</u></b> VGQA                                    |                                                       |                   |       |
| CRC_P2                       | EPCAM                             | <b><u>P2A</u></b>                              | VRT <b><u>YWIIIEI</u></b> LKHKAR                                   | 57%                                                   | 100%              |       |
|                              | SURVIVIN                          | <b><u>P2B</u></b>                              | TAKKVR <b><u>RAIEQLAAM</u></b>                                     |                                                       |                   |       |
| CRC_P3                       | EPCAM                             | <b><u>P3A</u></b>                              | <b><u>YVDEKAPEF</u></b> SMQGLK                                     | 43%                                                   | 95%               |       |
|                              | MAGE-A8                           | <b><u>P3B</u></b>                              | DE <b><u>KVAELVRFLL</u></b> RKY                                    |                                                       |                   |       |
| CRC_P6                       | CAGE1                             | <b><u>P6A</u></b>                              | LAS <b><u>KMHSLALM</u></b> VGL                                     | 58%                                                   | 99%               |       |
|                              | SURVIVIN                          | <b><u>P6B</u></b>                              | KDHRI <b><u>STFKNWPFL</u></b> E                                    |                                                       |                   |       |
| CRC_P7                       | CAGE1                             | <b><u>P7A</u></b>                              | <b><u>PKSMTMPAL</u></b> FKENR                                      | 57%                                                   | 87%               |       |
|                              | SPAG9                             | <b><u>P7B</u></b>                              | SGAV <b><u>MSERVSL</u></b> AGS                                     |                                                       |                   |       |
| CRC_P8                       | FBXO39                            | <b><u>P8A</u></b>                              | K <b><u>FMNPYNAVL</u></b> TKKFQ                                    | 90%                                                   | 100%              |       |
|                              | FBXO39                            | <b><u>P8B</u></b>                              | KVN <b><u>FFFERIMKY</u></b> ERL                                    |                                                       |                   |       |
|                              |                                   |                                                |                                                                    | ≥ 1 PEPI                                              | 98 %              | 100 % |
|                              |                                   |                                                |                                                                    | ≥ 2 PEPIs                                             | 91 %              | 100 % |

<sup>a</sup>CRC\_P1 and CRC\_P2 are included in mixture#1, the remaining peptides form mixture#2 of PolyPEPI1018.

<sup>b</sup>Uniprot(1) IDs of the target proteins: EPCAM, P16422; SURVIVIN, O15392; TSP50, Q9UI38; FBXO39, Q8N4B4; SPAG9, O60271; CAGE1, Q8TC20; MAGE-A8, P43361

<sup>c</sup>30mer's two core HLA class I epitopes/hotspots are **Bold, underlined** (also used as 9mer test peptides in immunoassays).

<sup>d</sup>Percentage of subjects in the *in silico* model population who are able to bind one or more epitopes of the vaccine peptides with at least 3 autologous HLA alleles (Personal EPItope, PEPI).

### Supplementary references

1. Consortium TU. UniProt: a worldwide hub of protein knowledge. *Nucleic Acids Res* 2018;**47**(D1):D506-D15 doi 10.1093/nar/gky1049 %J.
