# Supplementary material for: Safety and Activity of PolyPEPI1018 Combined with Maintenance Therapy in Metastatic Colorectal Cancer: an Open-Label, Multicenter, Phase Ib Study
Source: PubMed Central journal article supplement — Clin Cancer Res. 2022 Apr 26;28(13):2818–29. doi: 10.1158/1078-0432.CCR-22-0112 (PMC9365360; doi:10.1158/1078-0432.ccr-22-0112), 2022-04-26
Supplement: ccr-22-0112_table_s2_suppts2.pdf [file ccr-22-0112_table_s2_suppts2.pdf]

**Table S2: Summary of PolyPEPI1018-induced immune responses based on measured IVS ELISpot assay results**

| <b>Immunological responses</b>                                                                                                                                                                                                                                                 | <b>Number of patients<br/>% (n/N)</b> |
|--------------------------------------------------------------------------------------------------------------------------------------------------------------------------------------------------------------------------------------------------------------------------------|---------------------------------------|
| <b>CD8<sup>+</sup> T cell responses</b>                                                                                                                                                                                                                                        |                                       |
| Pre-existing                                                                                                                                                                                                                                                                   | 70% (7/10)                            |
| <i>De novo</i>                                                                                                                                                                                                                                                                 | 80% (8/10)                            |
| Post-vaccination (boosted + <i>de novo</i> )                                                                                                                                                                                                                                   | 90% (9/10)                            |
| Against $\geq 3$ TAAs                                                                                                                                                                                                                                                          | 80% (8/10)                            |
| <b>CD4<sup>+</sup> T cell responses</b>                                                                                                                                                                                                                                        |                                       |
| Pre-existing                                                                                                                                                                                                                                                                   | 100 % (10/10)                         |
| Post-vaccination                                                                                                                                                                                                                                                               | 100% (10/10)                          |
| <b>CD8<sup>+</sup> and CD4<sup>+</sup> T cell responses</b>                                                                                                                                                                                                                    | <b>90% (9/10)</b>                     |
| TAA: Tumor-associated antigen targeted by the vaccine; pre-existing: detected before vaccination; <i>de novo</i> : detected only after vaccination; boosted: at least two-fold increase in magnitude compared to pre-vaccination T cell responses. Related to Figure 3A and B. |                                       |
