# Supplementary material for: Safety and Activity of PolyPEPI1018 Combined with Maintenance Therapy in Metastatic Colorectal Cancer: an Open-Label, Multicenter, Phase Ib Study
Source: PubMed Central journal article supplement — Clin Cancer Res. 2022 Apr 26;28(13):2818–29. doi: 10.1158/1078-0432.CCR-22-0112 (PMC9365360; doi:10.1158/1078-0432.ccr-22-0112), 2022-04-26
Supplement: ccr-22-0112_table_s3_suppts3.pdf [file ccr-22-0112_table_s3_suppts3.pdf]

**Table S3: Predicted number of binding HLA class I alleles for the vaccine-specific core epitopes (9mers listed in Supplementary Table S1) grouped by target TAAs.**

| Patient | HLA class I Genotype                                           | Number of autologous HLA class I alleles predicted to bind the core (9mer) peptides |     |       |     |          |     |       |     |        |     |         |        |
|---------|----------------------------------------------------------------|-------------------------------------------------------------------------------------|-----|-------|-----|----------|-----|-------|-----|--------|-----|---------|--------|
|         |                                                                | TSP50                                                                               |     | EPCAM |     | SURVIVIN |     | CAGE1 |     | FBXO39 |     | MAGE-A8 | SPAG 9 |
|         |                                                                | P1A                                                                                 | P1B | P2A   | P3A | P2B      | P6B | P6A   | P7A | P8A    | P8B | P3B     | P7B    |
| 01-0001 | A*02:01<br>B*07:02<br>C*03:04<br>A*11:01<br>B*40:01<br>C*07:02 | 3                                                                                   | 0   | 5     | 1   | 2        | 1   | 1     | 3   | 3      | 1   | 3       | 3      |
| 01-0002 | A*02:01<br>B*07:02<br>C*07:02<br>A*31:01<br>B*15:01<br>C*15:02 | 2                                                                                   | 0   | 4     | 0   | 3        | 0   | 3     | 4   | 3      | 1   | 2       | 2      |
| 01-0003 | A*03:01<br>B*07:02<br>C*07:02<br>A*26:08<br>B*08:01<br>C*07:02 | 1                                                                                   | 1   | 2     | 0   | 2        | 1   | 1     | 1   | 3      | 4   | 1       | 3      |
| 01-0004 | A*03:01<br>B*07:02<br>C*03:03<br>A*32:01<br>B*15:01<br>C*07:02 | 1                                                                                   | 0   | 4     | 0   | 3        | 0   | 3     | 3   | 2      | 2   | 2       | 1      |
| 01-0005 | A*24:02<br>B*07:02<br>C*01:02<br>A*68:01<br>B*27:05<br>C*07:02 | 1                                                                                   | 2   | 3     | 1   | 2        | 1   | 3     | 2   | 2      | 1   | 2       | 2      |
| 01-0007 | A*01:01<br>B*08:01<br>C*06:02<br>A*25:01<br>B*37:01<br>C*07:01 | 1                                                                                   | 4   | 0     | 2   | 0        | 1   | 0     | 0   | 4      | 4   | 0       | 2      |
| 01-0008 | A*02:01<br>B*07:02<br>C*03:04<br>A*02:01<br>B*40:01<br>C*07:02 | 3                                                                                   | 0   | 5     | 1   | 2        | 1   | 2     | 4   | 4      | 1   | 4       | 4      |
| 02-0001 | A*02:01<br>B*40:02<br>C*04:01<br>A*30:02<br>B*57:02<br>C*15:02 | 3                                                                                   | 0   | 3     | 1   | 2        | 1   | 4     | 5   | 2      | 2   | 2       | 1      |
| 02-0002 | A*02:01<br>B*50:01<br>C*06:02<br>A*03:01<br>B*50:01<br>C*06:02 | 1                                                                                   | 2   | 0     | 1   | 0        | 0   | 4     | 1   | 5      | 3   | 1       | 3      |
| 02-0003 | A*02:01<br>B*18:01<br>C*07:01                                  | 2                                                                                   | 3   | 1     | 1   | 1        | 1   | 1     | 1   | 3      | 5   | 1       | 1      |

Hubbard et al, Safety and activity of PolyPEPI1018 combined with maintenance therapy in metastatic colorectal cancer: an open-label, multicenter, phase 1b study

|         |                                                                |   |   |   |   |   |   |   |   |   |   |   |   |
|---------|----------------------------------------------------------------|---|---|---|---|---|---|---|---|---|---|---|---|
|         | A*26:01<br>B*18:03<br>C*07:01                                  |   |   |   |   |   |   |   |   |   |   |   |   |
| 02-0004 | A*02:01<br>B*40:02<br>C*02:02<br>A*02:12<br>B*51:01<br>C*14:02 | 4 | 0 | 3 | 1 | 1 | 1 | 3 | 3 | 4 | 1 | 3 | 3 |
